# Supplementary material for: High-resolution nerve ultrasound and magnetic resonance neurography as complementary neuroimaging tools for chronic inflammatory demyelinating polyneuropathy
Source: PubMed Central journal article supplement — Ther Adv Neurol Disord. 2018 Mar 5;11:1756286418759974. doi: 10.1177/1756286418759974 (PMC5846906; doi:10.1177/1756286418759974), 2018-03-05
Supplement: supplementary_tables.pdf [file supplementary_tables.pdf]

| <i>Pat. Nr.</i> | <i>Age</i> | <i>ODSS score</i> | <i>Years<br/>from first diagnosis</i> |
|-----------------|------------|-------------------|---------------------------------------|
| 1               | 62         | 6                 | 7                                     |
| 2               | 49         | 2                 | 2                                     |
| 3               | 62         | 2                 | 13                                    |
| 4               | 62         | 2                 | 4                                     |
| 5               | 69         | 5                 | 1                                     |
| 6               | 57         | 3                 | 5                                     |
| 7               | 67         | 5                 | 9                                     |
| 8               | 63         | 4                 | 2                                     |
| 9               | 62         | 1                 | 4                                     |
| 10              | 51         | 4                 | 2                                     |
| 11              | 71         | 3                 | 4                                     |
| 12              | 63         | 2                 | 1                                     |
| 13              | 61         | 2                 | 3                                     |
| 14              | 65         | 4                 | 20                                    |
| 15              | 67         | 4                 | 2                                     |
| 16              | 55         | 4                 | 4                                     |
| 17              | 46         | 3                 | 1                                     |
| 18              | 51         | 1                 | 2                                     |

**Supplementary table 1:** Demographical data - CIDP patients.

|                                        | <i>ODSS</i> |          |          |
|----------------------------------------|-------------|----------|----------|
|                                        | <i>r</i>    | <i>p</i> | <i>n</i> |
| <i>US fibular fibular head</i>         | 0,3933      | 0,1317   | 16       |
| <i>US tibial knee</i>                  | 0,5276      | 0,0313   | 17       |
| <i>US tibial ankle</i>                 | 0,4141      |          | 18       |
| <i>US ulnar upper arm</i>              | 0,2293      | 0,3601   | 18       |
| <i>US median upper arm</i>             | 0,2386      | 0,3402   | 18       |
| <i>US radial upper arm</i>             | 0,4198      | 0,0828   | 18       |
| <i>US tibial ankle</i>                 | -0,06745    | 0,7903   | 18       |
| <i>US interscalene plexus cervical</i> | 0,1721      | 0,5741   | 13       |

**Supplementary table 2:** Correlations of CSA-HRUS with ODSS
